# Supplementary material for: The Efficacy of First-Generation EGFR-TKI Combined With Brain Radiotherapy as the First-Line Treatment for Lung Adenocarcinoma Patients With Brain Metastases and EGFR Sensitive Mutations: A Retrospective study
Source: PubMed Central journal article supplement — Technol Cancer Res Treat. 2021 Mar 10;20:1533033821997819. doi: 10.1177/1533033821997819 (PMC7958186; doi:10.1177/1533033821997819), 2021-03-10
Supplement: sj-pdf-1-tct-10.1177_1533033821997819.pdf [file sj-pdf-1-tct-10.1177_1533033821997819.pdf]

## Supporting information

**Table S1. The best response of two groups before progression.**

|                     | TKI+RT     | TKI        | <i>P</i> value |
|---------------------|------------|------------|----------------|
| <b>Intracranial</b> |            |            |                |
| CR                  | 4          | 1          |                |
| PR                  | 61         | 35         |                |
| SD                  | 10         | 10         |                |
| PD                  | 2          | 11         |                |
| ORR                 | 65 (84.4%) | 36 (63.2%) | 0.005          |
| DCR                 | 75 (97.4%) | 46 (80.7%) | 0.001          |
| <b>Systematic</b>   |            |            |                |
| CR                  | 0          | 0          |                |
| PR                  | 62         | 33         |                |
| SD                  | 9          | 10         |                |
| PD                  | 6          | 14         |                |
| ORR                 | 62 (80.5%) | 33 (57.9%) | 0.004          |
| DCR                 | 71 (92.2%) | 43 (74.5%) | 0.007          |

**Table S2. Univariate analysis and multivariate analysis of PFS.**

| Variable                          | Univariate |             |          | Multivariate |             |          |
|-----------------------------------|------------|-------------|----------|--------------|-------------|----------|
|                                   | HR         | 95% CI      | <i>P</i> | HR           | 95% CI      | <i>P</i> |
| <b>Age</b>                        |            |             |          |              |             |          |
| ≤ 60                              | 1          |             |          |              |             |          |
| > 60                              | 0.823      | 0.562-1.204 | 0.315    |              |             |          |
| <b>Gender</b>                     |            |             |          |              |             |          |
| male                              | 1          |             |          |              |             |          |
| female                            | 0.827      | 0.574-1.192 | 0.309    |              |             |          |
| <b>Smoking</b>                    |            |             |          |              |             |          |
| Never                             | 1          |             |          |              |             |          |
| Current / ex-smoking              | 1.249      | 0.855-1.827 | 0.250    |              |             |          |
| <b>KPS</b>                        |            |             |          |              |             |          |
| ≤ 80                              | 1          |             |          |              |             |          |
| > 80                              | 0.987      | 0.692-1.406 | 0.941    |              |             |          |
| <b>Number of brain metastases</b> |            |             |          |              |             |          |
| ≤ 3                               | 1          |             |          |              |             |          |
| > 3                               | 0.892      | 0.625-1.273 | 0.528    |              |             |          |
| <b>Symptoms</b>                   |            |             |          |              |             |          |
| No                                | 1          |             |          |              |             |          |
| Yes                               | 0.618      | 0.423-0.904 | 0.013    |              |             |          |
| <b>Extracranial metastases</b>    |            |             |          |              |             |          |
| No                                | 1          |             |          |              |             |          |
| Yes                               | 1.127      | 0.780-1.628 | 0.524    |              |             |          |
| <b>EGFR mutation</b>              |            |             |          |              |             |          |
| Del-19                            | 1          |             |          |              |             |          |
| 21-L858R                          | 1.080      | 0.753-1.549 | 0.674    |              |             |          |
| Other                             | 1.411      | 0.511-3.901 | 0.507    |              |             |          |
| <b>Brain radiotherapy</b>         |            |             |          |              |             |          |
| No                                | 1          |             |          | 1            |             |          |
| Yes                               | 0.613      | 0.428-0.879 | 0.008    | 0.675        | 0.468-0.973 | 0.035    |
| <b>EGFR TKI</b>                   |            |             |          |              |             |          |
| Erlotinib                         | 1          |             |          | 1            |             |          |
| Icotinib                          | 2.314      | 1.277-4.192 | 0.006    | 2.347        | 1.285-4.285 | 0.005    |

|                                 |       |             |       |       |             |       |
|---------------------------------|-------|-------------|-------|-------|-------------|-------|
| Gefitinib                       | 2.209 | 1.162-4.198 | 0.016 | 2.237 | 1.169-4.282 | 0.015 |
| Other                           | 1.156 | 0.261-5.116 | 0.849 | 1.600 | 0.357-7.174 | 0.539 |
| <b>Combination of CT or AAD</b> |       |             |       |       |             |       |
| No                              | 1     |             |       | 1     |             |       |
| Yes                             | 0.567 | 0.394-0.815 | 0.002 | 0.570 | 0.395-0.823 | 0.003 |

**Table S3. Univariate analysis and multivariate analysis of OS.**

| Variable                          | Univariate |             |       | Multivariate |              |       |
|-----------------------------------|------------|-------------|-------|--------------|--------------|-------|
|                                   | HR         | 95% CI      | P     | HR           | 95% CI       | P     |
| <b>Age</b>                        |            |             |       |              |              |       |
| ≤ 60                              | 1          |             |       | 1            |              |       |
| > 60                              | 1.728      | 1.052-2.838 | 0.031 | 1.411        | 0.839-2.374  | 0.194 |
| <b>Gender</b>                     |            |             |       |              |              |       |
| male                              | 1          |             |       |              |              |       |
| female                            | 1.357      | 0.806-2.284 | 0.251 |              |              |       |
| <b>Smoking</b>                    |            |             |       |              |              |       |
| Never                             | 1          |             |       |              |              |       |
| Current / ex-smoking              | 0.969      | 0.571-1/645 | 0.907 |              |              |       |
| <b>KPS</b>                        |            |             |       |              |              |       |
| ≤ 80                              | 1          |             |       | 1            |              |       |
| > 80                              | 0.607      | 0.370-0.995 | 0.048 | 0.657        | 0.377-1.148  | 0.140 |
| <b>Number of brain metastases</b> |            |             |       |              |              |       |
| ≤ 3                               | 1          |             |       |              |              |       |
| > 3                               | 1.075      | 0.655-1.763 | 0.775 |              |              |       |
| <b>Symptoms</b>                   |            |             |       |              |              |       |
| No                                | 1          |             |       |              |              |       |
| Yes                               | 0.523      | 0.303-0.904 | 0.020 |              |              |       |
| <b>Extracranial metastases</b>    |            |             |       |              |              |       |
| No                                | 1          |             |       |              |              |       |
| Yes                               | 1.556      | 0.901-2.685 | 0.113 |              |              |       |
| <b>EGFR mutation</b>              |            |             |       |              |              |       |
| Del-19                            | 1          |             |       | 1            |              |       |
| 21-L858R                          | 2.116      | 1.248-3.589 | 0.005 | 2.460        | 1.415-4.277  | 0.001 |
| Other                             | 1.713      | 0.486-6.036 | 0.402 | 2.671        | 0.667-10.695 | 0.165 |
| <b>Brain radiotherapy</b>         |            |             |       |              |              |       |
| No                                | 1          |             |       | 1            |              |       |
| Yes                               | 0.558      | 0.342-0.913 | 0.020 | 0.550        | 0.327-0.927  | 0.025 |
| <b>EGFR TKI</b>                   |            |             |       |              |              |       |
| Erlotinib                         | 1          |             |       | 1            |              |       |
| Icotinib                          | 2.523      | 1.103-5.771 | 0.028 | 2.930        | 1.184-7.256  | 0.020 |
| Gefitinib                         | 2.178      | 0.921-5.150 | 0.076 | 2.091        | 0.813-5.374  | 0.126 |
| Other                             | 1.986      | 0.410-9.619 | 0.394 | 6.073        | 1.125-32.772 | 0.036 |
| <b>Combination of CT or AAD</b>   |            |             |       |              |              |       |
| No                                | 1          |             |       | 1            |              |       |
| Yes                               | 0.632      | 0.379-1.055 | 0.079 | 0.557        | 0.326-0.950  | 0.032 |

**Figure S1. Key subgroups analysis of PFS (A) and OS (B).**

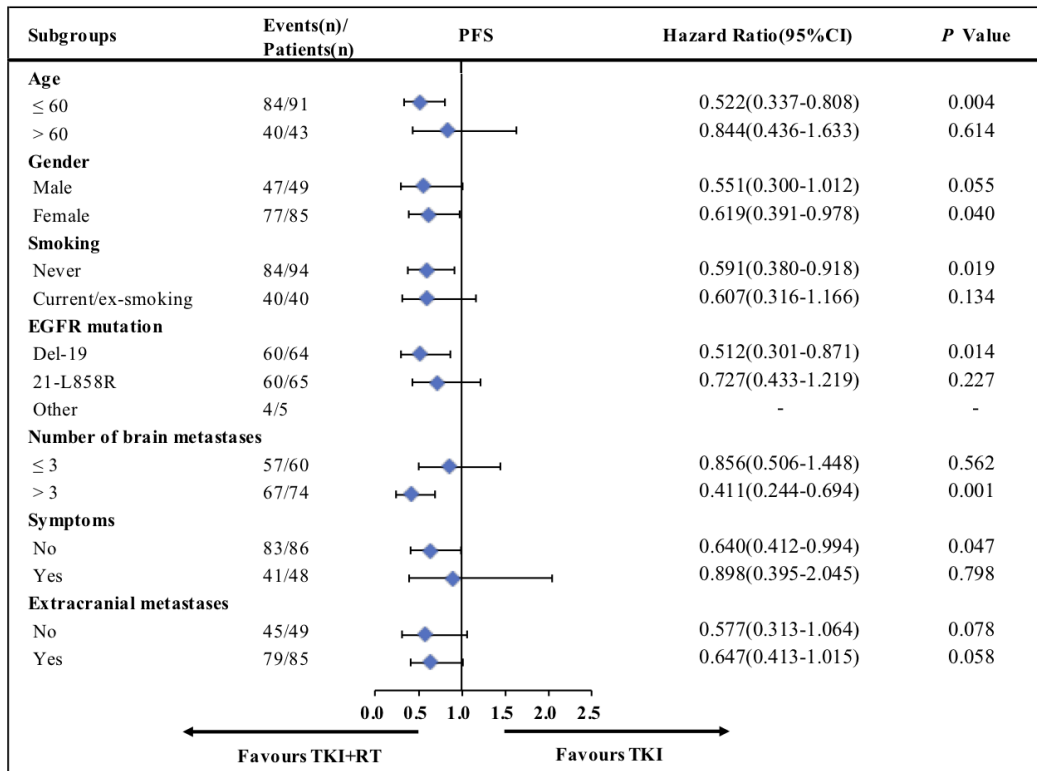

**Figure S1 A**

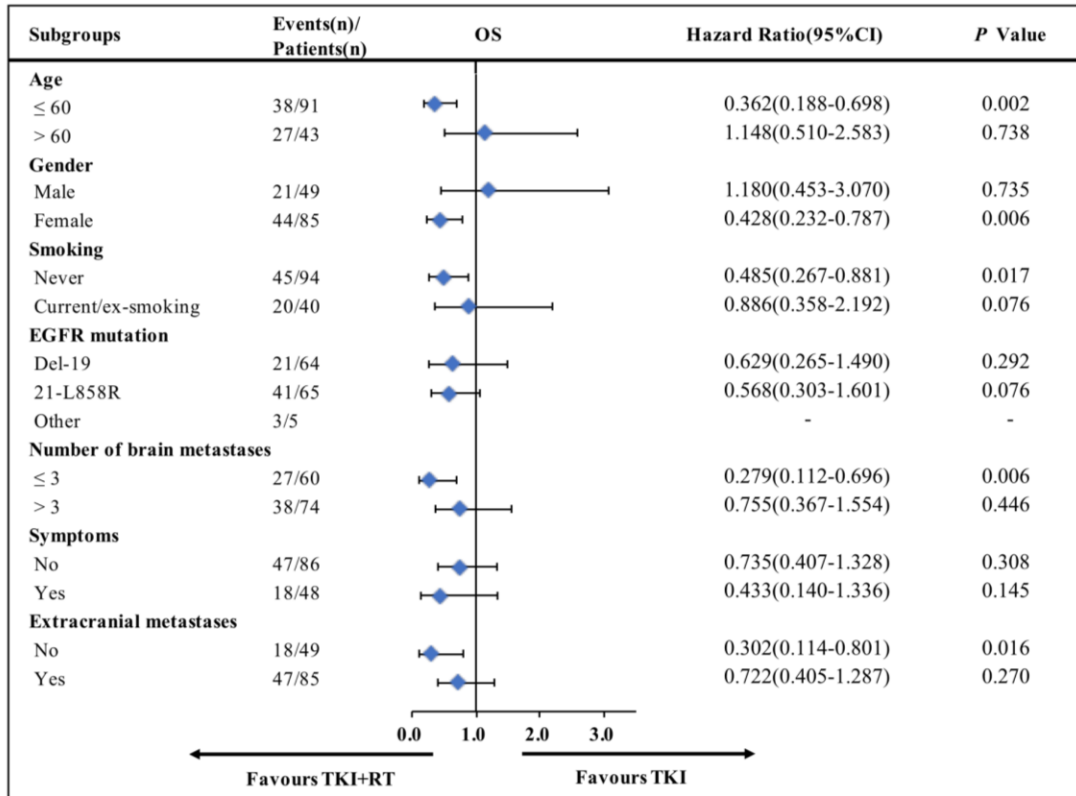

**Figure S1 B**
